# Supplementary material for: TiO2/Fe2O3 heterostructures with enhanced photocatalytic reduction of Cr(vi) under visible light irradiation
Source: PubMed Central journal article supplement — RSC Adv. 2019 Jul 23;9(39):22764–71. doi: 10.1039/c9ra03531a (PMC9067145; doi:10.1039/c9ra03531a), 2019-07-23
Supplement: RA-009-C9RA03531A-s001.pdf [file RA-009-C9RA03531A-s001.pdf]

## Supporting Information

### **TiO<sub>2</sub>/Fe<sub>2</sub>O<sub>3</sub> heterostructures with enhanced photocatalytic reduction of Cr(VI) under visible light irradiation**

Qiufeng Mei<sup>a</sup>, Feiyan Zhang<sup>a</sup>, Ning Wang<sup>a</sup>, Yun Yang<sup>b</sup>, Ronglan Wu<sup>a\*</sup> and Wei Wang<sup>c\*</sup>

a Key Laboratory of Oil & Gas Fine Chemicals, College of Chemistry and Chemical Engineering of Xinjiang University, Urumqi 830046, China.

b Nanomaterials and Chemistry Key Laboratory, Wenzhou University, Wenzhou 325027, China.

c. Department of Chemistry and Center for Pharmacy, University of Bergen, Bergen 5020, Norway.

\*Email: [Wei.wang@uib.no](mailto:Wei.wang@uib.no) (Wei Wang); [wuronglan@163.com](mailto:wuronglan@163.com) (Ronglan Wu).

As two peaks of anatase TiO<sub>2</sub> (101) facets and hematite Fe<sub>2</sub>O<sub>3</sub> (104) facets with the relative intensity of 100% are chosen as calculation targets, the phase composition of crystalline TiO<sub>2</sub> nanosheets/Fe<sub>2</sub>O<sub>3</sub> nanocomposites can be calculated by means of the following expressions (1-3):

$$K_A^H = RIR(H)/RIR(A) \quad (1)$$

$$W_A/\% = I_A/(I_A + I_H/K_A^H) \quad (2)$$

$$W_H/\% = I_H/(I_H + I_A \times K_A^H) \quad (3)$$

Where  $W_A$  and  $W_H$  are the weight fractions of anatase TiO<sub>2</sub> and hematite Fe<sub>2</sub>O<sub>3</sub>, respectively, and  $I_A$  and  $I_H$  are the intensities of anatase (101) face and hematite (104) face peaks in the XRD spectra, respectively. From the PDF database, RIR(A) and RIR(H) are the reference intensity ratios of anatase TiO<sub>2</sub> and hematite Fe<sub>2</sub>O<sub>3</sub> with their values at 3.3 and 2.4, respectively.

**Table S1** The weight fractions of anatase TiO<sub>2</sub> and hematite Fe<sub>2</sub>O<sub>3</sub>, and zeta potentials of TiO<sub>2</sub>, TF0.1, TF0.2, TF0.5, TF1.0, TF2.0 and Fe<sub>2</sub>O<sub>3</sub>.

|                   | TiO <sub>2</sub> | TF0.1 | TF0.2 | TF0.5 | TF1.0 | TF2.0 | Fe <sub>2</sub> O <sub>3</sub> |
|-------------------|------------------|-------|-------|-------|-------|-------|--------------------------------|
| $W_A/\%$          | 100              | 95.5  | 94.4  | 89.0  | 80.3  | 61.1  | 0                              |
| $W_H/\%$          | 0                | 4.5   | 5.6   | 11.0  | 19.7  | 38.9  | 100                            |
| Zeta potential/mV | -5.96            | 5.07  | 9.76  | 12.18 | 18.68 | 17.92 | 7.98                           |

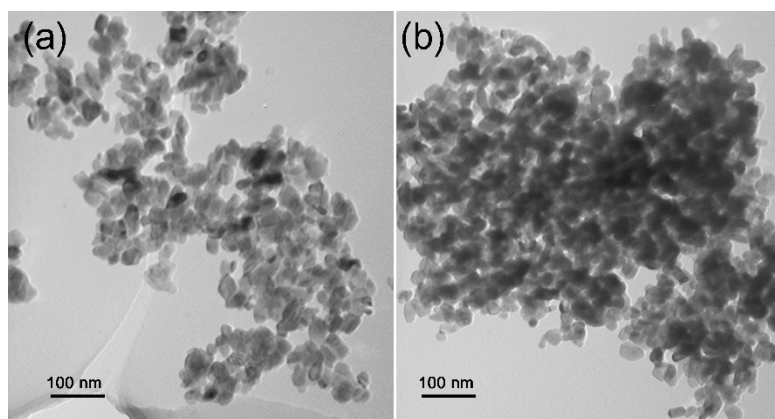

**Fig. S1** TEM images of (a) TF0.1 and (b) TF2.0.

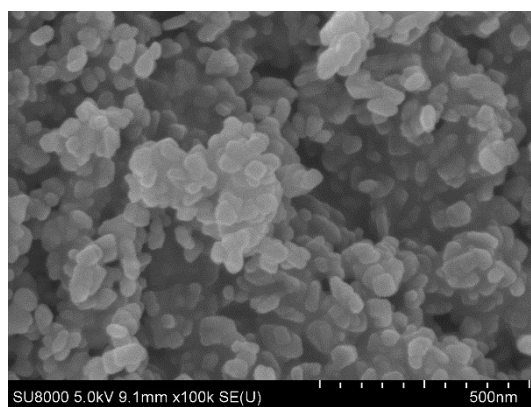

**Fig. S2** SEM image of TF0.5.

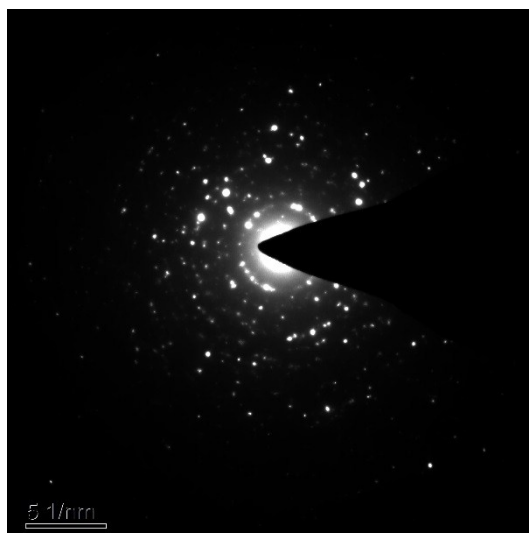

**Fig. S3** SAED patterns of TF0.5.

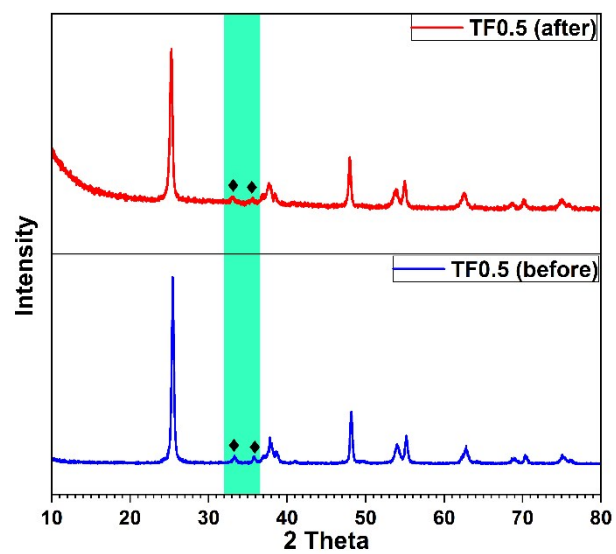

**Fig. S4** XRD patterns of TF0.5 before and after cyclic photoreduction Cr(VI) experiments.

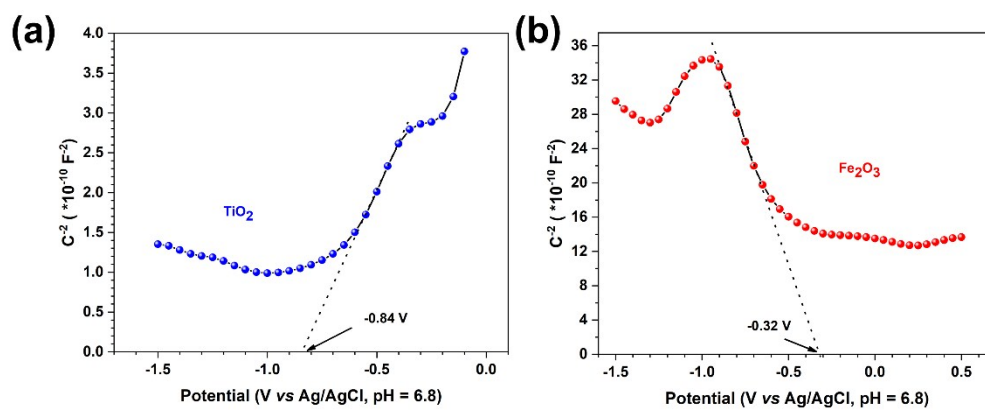

**Fig. S5** the Mott-Schottky plots of  $\text{TiO}_2$  and  $\text{Fe}_2\text{O}_3$ . The frequency is 1000 Hz.

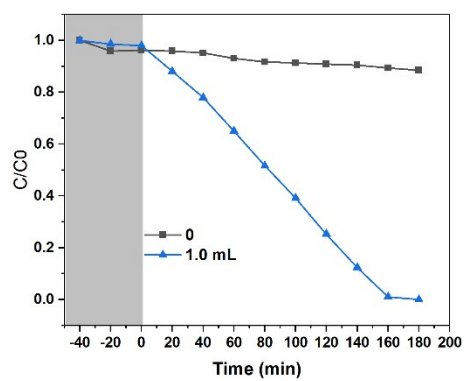

**Fig. S6** Effect of citric acid on photoreduction Cr(VI) of TF0.5.
